# Supplementary material for: Facile synthesis of highly water-dispersible and monodispersed Fe3O4 hollow microspheres and their application in water treatment
Source: Royal Society of Chemistry journal article supplement (doi:10.1039/c3ra42716a), 2013-01-01
Supplement: c3ra42716a.pdf [file c3ra42716a.pdf]

## Supporting Information

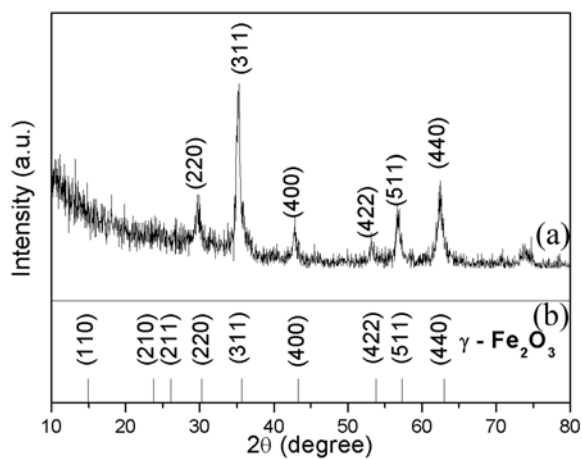

5

**Fig. S1** (a) XRD pattern of typical  $\text{Fe}_3\text{O}_4$  hollow microspheres (scanning time 10 minutes), and (b) the typical XRD pattern of  $\gamma\text{-Fe}_2\text{O}_3$  (JCPDS Card No. 39-1346).

10

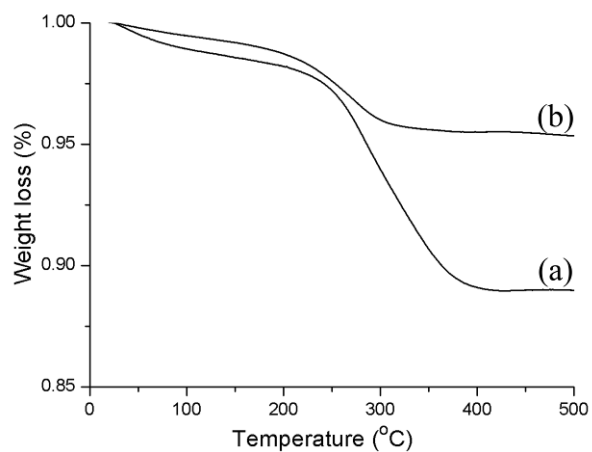

15

**Fig. S2** TG analysis of  $\text{Fe}_3\text{O}_4$  hollow microspheres synthesized with PAAS (a) and without PAAS (b).

20

25

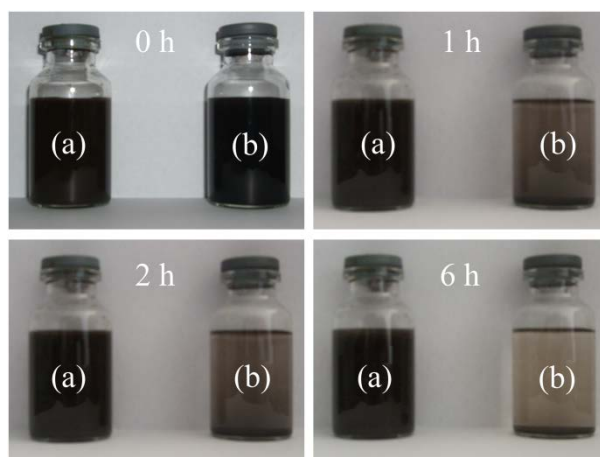

**Fig S3.** The photos about water-dispersibility of the products synthesized by (a) PAAS and (b) PAM as dispersants at different times.

5

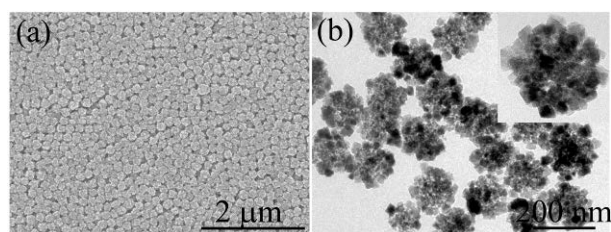

**Fig. S4** SEM and TEM images of the product synthesized with PAAS (1.5 g).

10

15

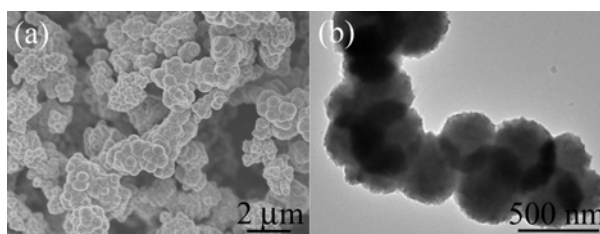

**Fig.S5** SEM and TEM images of the product synthesized without PAAS.

20

25

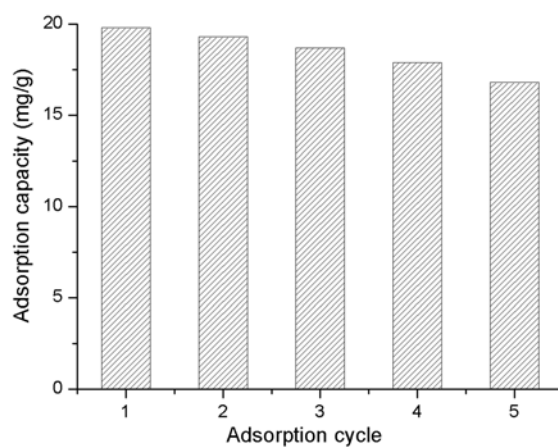

**Fig. S6** Adsorption-desorption cycles.

5

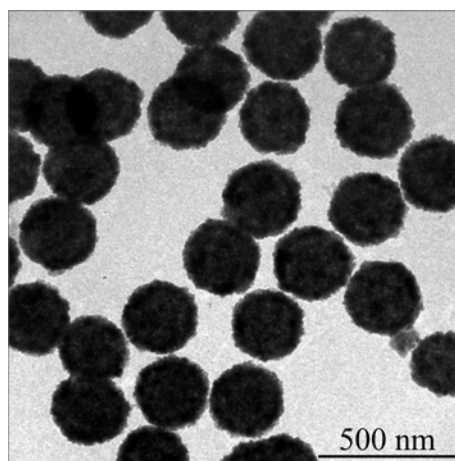

**Fig. S7** TEM image of Fe<sub>3</sub>O<sub>4</sub> hollow microspheres after five cycles

10

**Table S1** The relationship between the amount of PAAS and the viscosity of the corresponding solution (20 °C).

|                   |      |      |      |       |       |
|-------------------|------|------|------|-------|-------|
| PAAS (g)          | 0    | 0.2  | 0.6  | 1.0   | 1.5   |
| Viscosity (mPa/s) | 1.03 | 2.92 | 5.85 | 11.23 | 18.96 |

**Table S2** Langmuir and Freundlich isothermal parameters for Pb<sup>2+</sup> adsorption on Fe<sub>3</sub>O<sub>4</sub> hollow microspheres.

| Langmuir       |      |                | Freundlich |       |                |
|----------------|------|----------------|------------|-------|----------------|
| Q <sub>m</sub> | b    | R <sup>2</sup> | k          | 1/n   | R <sup>2</sup> |
| 23.8           | 1.31 | 0.99           | 17.6       | 0.074 | 0.86           |

15
